# Supplementary material for: Measurement of Oxidative Stress Index (OSI) in Penile Corpora Cavernosa and Peripheral Blood of Peyronie’s Disease Patients: A Report of 49 Cases
Source: MDPI journal article supplement (doi:10.3390/metabo14010055), 2024-01-15
Supplement: s1 [file s1]

**Table S1.** Values of d-ROMs, PAT and relative OSI index ("systemic" and "in penile corpora cavernosa") of the 49 patients with Peyronie's disease.

| d-ROMs values                                                                                                              |     |      | PAT values               |     |      | OSI index              |  |  |
|----------------------------------------------------------------------------------------------------------------------------|-----|------|--------------------------|-----|------|------------------------|--|--|
| Carratelli units (Carr. U.)                                                                                                |     |      | Cornelli units (Cor. U.) |     |      | penile plasma sample   |  |  |
| systemic plasma sample                                                                                                     |     |      | systemic plasma sample   |     |      | systemic plasma sample |  |  |
| d-ROMs values                                                                                                              |     |      | PAT values               |     |      | OSI index              |  |  |
| Carratelli units (Carr. U.)                                                                                                |     |      | Cornelli units (Cor. U.) |     |      | penile plasma sample   |  |  |
| penile plasma sample                                                                                                       |     |      | penile plasma sample     |     |      | penile plasma sample   |  |  |
| 1.                                                                                                                         | 360 | 4242 | 0.087                    | 414 | 3125 | 0.132                  |  |  |
| 2.                                                                                                                         | 354 | 3778 | 0.094                    | 570 | 2949 | 0.193                  |  |  |
| 3.                                                                                                                         | 352 | 3283 | 0.107                    | 390 | 2358 | 0.165                  |  |  |
| 4.                                                                                                                         | 498 | 4619 | 0.107                    | 569 | 2910 | 0.195                  |  |  |
| 5.                                                                                                                         | 428 | 3841 | 0.111                    | 395 | 2825 | 0.139                  |  |  |
| 6.                                                                                                                         | 344 | 3410 | 0.100                    | 447 | 2680 | 0.166                  |  |  |
| 7.                                                                                                                         | 441 | 4057 | 0.108                    | 616 | 2934 | 0.209                  |  |  |
| 8.                                                                                                                         | 470 | 3545 | 0.136                    | 352 | 2590 | 0.135                  |  |  |
| 9.                                                                                                                         | 339 | 3055 | 0.110                    | 543 | 2368 | 0.229                  |  |  |
| 10.                                                                                                                        | 282 | 2532 | 0.111                    | 702 | 2885 | 0.243                  |  |  |
| 11.                                                                                                                        | 502 | 3114 | 0.161                    | 410 | 3183 | 0.128                  |  |  |
| 12.                                                                                                                        | 539 | 3152 | 0.171                    | 401 | 3102 | 0.129                  |  |  |
| 13.                                                                                                                        | 424 | 3176 | 0.133                    | 513 | 3557 | 0.144                  |  |  |
| 14.                                                                                                                        | 354 | 2756 | 0.128                    | 605 | 2941 | 0.205                  |  |  |
| 15.                                                                                                                        | 390 | 4288 | 0.090                    | 412 | 3562 | 0.115                  |  |  |
| 16.                                                                                                                        | 390 | 3080 | 0.126                    | 535 | 2825 | 0.189                  |  |  |
| 17.                                                                                                                        | 321 | 2631 | 0.122                    | 439 | 2389 | 0.183                  |  |  |
| 18.                                                                                                                        | 291 | 3157 | 0.092                    | 438 | 2665 | 0.164                  |  |  |
| 19.                                                                                                                        | 358 | 2576 | 0.138                    | 508 | 2716 | 0.187                  |  |  |
| 20.                                                                                                                        | 352 | 2842 | 0.123                    | 464 | 2964 | 0.156                  |  |  |
| 21.                                                                                                                        | 580 | 4080 | 0.142                    | 560 | 2564 | 0.218                  |  |  |
| 22.                                                                                                                        | 342 | 2885 | 0.118                    | 416 | 2840 | 0.146                  |  |  |
| 23.                                                                                                                        | 392 | 3245 | 0.120                    | 503 | 2631 | 0.191                  |  |  |
| 24.                                                                                                                        | 414 | 2643 | 0.165                    | 403 | 2798 | 0.144                  |  |  |
| 25.                                                                                                                        | 246 | 1826 | 0.134                    | 464 | 2787 | 0.166                  |  |  |
| 26.                                                                                                                        | 205 | 3123 | 0.065                    | 479 | 2941 | 0.162                  |  |  |
| 27.                                                                                                                        | 280 | 2821 | 0.099                    | 382 | 2885 | 0.132                  |  |  |
| 28.                                                                                                                        | 418 | 3042 | 0.137                    | 415 | 2737 | 0.151                  |  |  |
| 29.                                                                                                                        | 438 | 2830 | 0.154                    | 436 | 3216 | 0.135                  |  |  |
| 30.                                                                                                                        | 485 | 3162 | 0.155                    | 399 | 2892 | 0.137                  |  |  |
| 31.                                                                                                                        | 245 | 3052 | 0.080                    | 400 | 2430 | 0.164                  |  |  |
| 32.                                                                                                                        | 324 | 2641 | 0.122                    | 448 | 3719 | 0.120                  |  |  |
| 33.                                                                                                                        | 314 | 3218 | 0.097                    | 725 | 3045 | 0.238                  |  |  |
| 34.                                                                                                                        | 341 | 3353 | 0.101                    | 506 | 3936 | 0.128                  |  |  |
| 35.                                                                                                                        | 422 | 3157 | 0.133                    | 399 | 2928 | 0.136                  |  |  |
| 36.                                                                                                                        | 326 | 2641 | 0.121                    | 572 | 3440 | 0.166                  |  |  |
| 37.                                                                                                                        | 339 | 3096 | 0.109                    | 498 | 2823 | 0.176                  |  |  |
| 38.                                                                                                                        | 300 | 2861 | 0.104                    | 551 | 3442 | 0.160                  |  |  |
| 39.                                                                                                                        | 603 | 3937 | 0.153                    | 521 | 3564 | 0.146                  |  |  |
| 40.                                                                                                                        | 387 | 3526 | 0.109                    | 555 | 2991 | 0.185                  |  |  |
| 41.                                                                                                                        | 498 | 2990 | 0.166                    | 534 | 2537 | 0.210                  |  |  |
| 42.                                                                                                                        | 379 | 2842 | 0.133                    | 612 | 3985 | 0.153                  |  |  |
| 43.                                                                                                                        | 338 | 2685 | 0.125                    | 410 | 2652 | 0.154                  |  |  |
| 44.                                                                                                                        | 330 | 2034 | 0.108                    | 425 | 3564 | 0.119                  |  |  |
| 45.                                                                                                                        | 319 | 3080 | 0.103                    | 409 | 2840 | 0.144                  |  |  |
| 46.                                                                                                                        | 359 | 2806 | 0.127                    | 563 | 4608 | 0.122                  |  |  |
| 47.                                                                                                                        | 435 | 2464 | 0.176                    | 525 | 2685 | 0.195                  |  |  |
| 48.                                                                                                                        | 468 | 4199 | 0.111                    | 538 | 2641 | 0.203                  |  |  |
| 49.                                                                                                                        | 538 | 3576 | 0.150                    | 384 | 3111 | 0.123                  |  |  |
| NOTE : d-ROMs = derived from the Reactive Oxygen Metabolites; PAT = Plasma Antioxidant Test; OSI = Oxidative Stress Index. |     |      |                          |     |      |                        |  |  |

**Table S2.** Values of d-ROMs, PAT and relative OSI index ("systemic" and "in penile corpora cavernosa") of the 50 normal cases (control group).

| d-ROMs values                                                                                                              |     |      | PAT values               |     |      | OSI index              |  |  |
|----------------------------------------------------------------------------------------------------------------------------|-----|------|--------------------------|-----|------|------------------------|--|--|
| Carratelli units (Carr. U.)                                                                                                |     |      | Cornelli units (Cor. U.) |     |      | systemic plasma sample |  |  |
| systemic plasma sample                                                                                                     |     |      | systemic plasma sample   |     |      | systemic plasma sample |  |  |
| d-ROMs values                                                                                                              |     |      | PAT values               |     |      | OSI index              |  |  |
| Carratelli units (Carr. U.)                                                                                                |     |      | Cornelli units (Cor. U.) |     |      | penile plasma sample   |  |  |
| penile plasma sample                                                                                                       |     |      | penile plasma sample     |     |      | penile plasma sample   |  |  |
| 1.                                                                                                                         | 434 | 3920 | 0.110                    | 356 | 3465 | 0.102                  |  |  |
| 2.                                                                                                                         | 443 | 4057 | 0.109                    | 309 | 3704 | 0.080                  |  |  |
| 3.                                                                                                                         | 476 | 4085 | 0.116                    | 348 | 2939 | 0.118                  |  |  |
| 4.                                                                                                                         | 392 | 3516 | 0.111                    | 307 | 2956 | 0.103                  |  |  |
| 5.                                                                                                                         | 385 | 3843 | 0.100                    | 169 | 3836 | 0.044                  |  |  |
| 6.                                                                                                                         | 315 | 2951 | 0.106                    | 294 | 3327 | 0.088                  |  |  |
| 7.                                                                                                                         | 539 | 4461 | 0.120                    | 309 | 3320 | 0.093                  |  |  |
| 8.                                                                                                                         | 373 | 3651 | 0.102                    | 387 | 3412 | 0.084                  |  |  |
| 9.                                                                                                                         | 269 | 2763 | 0.097                    | 299 | 3217 | 0.092                  |  |  |
| 10.                                                                                                                        | 295 | 3419 | 0.093                    | 242 | 3316 | 0.072                  |  |  |
| 11.                                                                                                                        | 329 | 3544 | 0.092                    | 258 | 3017 | 0.085                  |  |  |
| 12.                                                                                                                        | 334 | 3034 | 0.110                    | 219 | 3302 | 0.066                  |  |  |
| 13.                                                                                                                        | 289 | 2842 | 0.101                    | 258 | 3064 | 0.084                  |  |  |
| 14.                                                                                                                        | 323 | 2756 | 0.117                    | 288 | 2998 | 0.096                  |  |  |
| 15.                                                                                                                        | 423 | 3632 | 0.116                    | 315 | 2895 | 0.108                  |  |  |
| 16.                                                                                                                        | 425 | 3544 | 0.119                    | 350 | 2971 | 0.117                  |  |  |
| 17.                                                                                                                        | 415 | 3622 | 0.114                    | 261 | 2891 | 0.092                  |  |  |
| 18.                                                                                                                        | 334 | 4006 | 0.083                    | 222 | 2955 | 0.075                  |  |  |
| 19.                                                                                                                        | 299 | 2984 | 0.100                    | 262 | 3103 | 0.084                  |  |  |
| 20.                                                                                                                        | 403 | 3719 | 0.103                    | 288 | 2821 | 0.102                  |  |  |
| 21.                                                                                                                        | 377 | 3848 | 0.097                    | 250 | 2860 | 0.087                  |  |  |
| 22.                                                                                                                        | 441 | 4613 | 0.095                    | 279 | 3005 | 0.092                  |  |  |
| 23.                                                                                                                        | 372 | 3914 | 0.095                    | 312 | 3416 | 0.091                  |  |  |
| 24.                                                                                                                        | 322 | 3735 | 0.086                    | 305 | 4101 | 0.074                  |  |  |
| 25.                                                                                                                        | 275 | 3283 | 0.083                    | 238 | 3572 | 0.092                  |  |  |
| 26.                                                                                                                        | 344 | 3739 | 0.092                    | 313 | 2981 | 0.104                  |  |  |
| 27.                                                                                                                        | 272 | 4315 | 0.063                    | 300 | 3704 | 0.080                  |  |  |
| 28.                                                                                                                        | 382 | 4461 | 0.085                    | 411 | 4057 | 0.101                  |  |  |
| 29.                                                                                                                        | 367 | 4901 | 0.074                    | 437 | 4324 | 0.101                  |  |  |
| 30.                                                                                                                        | 341 | 4461 | 0.076                    | 386 | 5426 | 0.071                  |  |  |
| 31.                                                                                                                        | 401 | 3824 | 0.104                    | 415 | 3946 | 0.105                  |  |  |
| 32.                                                                                                                        | 409 | 4652 | 0.087                    | 325 | 3112 | 0.104                  |  |  |
| 33.                                                                                                                        | 410 | 3753 | 0.109                    | 377 | 3352 | 0.112                  |  |  |
| 34.                                                                                                                        | 499 | 4489 | 0.111                    | 451 | 3854 | 0.117                  |  |  |
| 35.                                                                                                                        | 371 | 3224 | 0.114                    | 321 | 3252 | 0.098                  |  |  |
| 36.                                                                                                                        | 513 | 4922 | 0.104                    | 361 | 3955 | 0.091                  |  |  |
| 37.                                                                                                                        | 294 | 2785 | 0.105                    | 261 | 2551 | 0.102                  |  |  |
| 38.                                                                                                                        | 448 | 4370 | 0.102                    | 410 | 3891 | 0.103                  |  |  |
| 39.                                                                                                                        | 363 | 3712 | 0.097                    | 341 | 3096 | 0.110                  |  |  |
| 40.                                                                                                                        | 371 | 3597 | 0.103                    | 372 | 3263 | 0.114                  |  |  |
| 41.                                                                                                                        | 358 | 3515 | 0.101                    | 412 | 3597 | 0.114                  |  |  |
| 42.                                                                                                                        | 318 | 3055 | 0.104                    | 352 | 2992 | 0.117                  |  |  |
| 43.                                                                                                                        | 511 | 4947 | 0.103                    | 485 | 4295 | 0.112                  |  |  |
| 44.                                                                                                                        | 436 | 4126 | 0.105                    | 452 | 3896 | 0.116                  |  |  |
| 45.                                                                                                                        | 401 | 4075 | 0.098                    | 428 | 3877 | 0.110                  |  |  |
| 46.                                                                                                                        | 519 | 4341 | 0.119                    | 536 | 4871 | 0.110                  |  |  |
| 47.                                                                                                                        | 430 | 4080 | 0.105                    | 417 | 3597 | 0.115                  |  |  |
| 48.                                                                                                                        | 482 | 4540 | 0.106                    | 431 | 3690 | 0.116                  |  |  |
| 49.                                                                                                                        | 288 | 2550 | 0.112                    | 251 | 2116 | 0.118                  |  |  |
| 50.                                                                                                                        | 402 | 4134 | 0.097                    | 286 | 4387 | 0.065                  |  |  |
| NOTE : d-ROMs = derived from the Reactive Oxygen Metabolites; PAT = Plasma Antioxidant Test; OSI = Oxidative Stress Index. |     |      |                          |     |      |                        |  |  |
